# Supplementary material
Source: PubMed Central journal article supplement (PMC8229829)
Supplement: sj-pdf-1-jvd-10.1177_10406387211015294.pdf [file sj-pdf-1-jvd-10.1177_10406387211015294.pdf]

Anthony T, et al. Vaccination with Rift Valley fever virus live attenuated vaccine strain Smithburn caused meningoencephalitis in alpacas

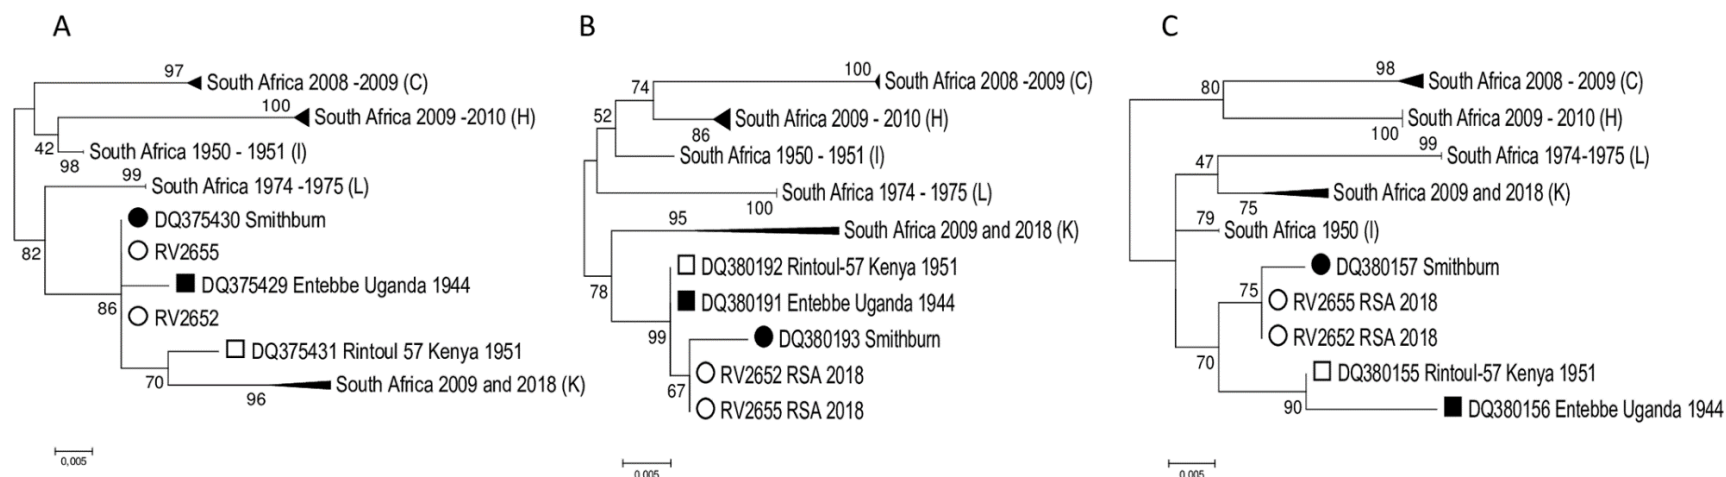

**Supplementary Figure 1.** Phylogenetic comparison of the partial genome segments of Rift Valley fever viruses from all of the previous outbreaks in South Africa, as well as from alpacas in South Africa in 2018 (case 1: RV2655\_RSA\_2018; case 3: RV2652\_RSA\_2018) marked with open circles. The original RVF\_Entebbe\_Uganda\_44 (black square) as well as derivatives from it RVF\_Rintoul-57\_Kenya\_1951 (open square) and Smithburn vaccine strain (black dot) were obtained from GenBank. **A.** Large segment; **B.** Medium segment; **C.** Small segment.
